# Supplementary material
Source: MDPI journal article supplement (https://www.mdpi.com/2071-1050/11/8/2227)
Supplement: s1 [file s1]

## **Supplementary Information**

# **Analysing spatial congruencies and mismatches between supply, demand and flow of ecosystem services and sustainable development**

Uta Schirpke et al.

Table 1: Indicators of ecosystem services (modified from Schirpke et al. [1]).

| Category             | Ecosystem service | Component | Indicator                 | Method                                                                                                                                                                                                                                                                                                       | Unit                                        | Full details on data sources and methods                                                                                                          |
|----------------------|-------------------|-----------|---------------------------|--------------------------------------------------------------------------------------------------------------------------------------------------------------------------------------------------------------------------------------------------------------------------------------------------------------|---------------------------------------------|---------------------------------------------------------------------------------------------------------------------------------------------------|
| Provisioning service | Fresh water       | Supply    | Water availability        | Quantity of water runoff from subcatchments of the Alpine space estimated by the hydropower model from the InVEST toolbox based on root restricting layer depth (mm), plant available water content, average annual precipitation, average annual potential evapotranspiration and land use/land cover [2,3] | $\text{m}^3 \text{ ha}^{-1} \text{ y}^{-1}$ | <a href="http://www.wikialps.eu/doku.php?id=wiki:water_availability">http://www.wikialps.eu/doku.php?id=wiki:water_availability</a>               |
|                      |                   | Flow      | Water use                 | Water usage based on regional water statistics downscaled to municipality level using touristic and demographic data [3]                                                                                                                                                                                     | $\text{m}^3 \text{ ha}^{-1} \text{ y}^{-1}$ | <a href="http://www.wikialps.eu/doku.php?id=wiki:water_use">http://www.wikialps.eu/doku.php?id=wiki:water_use</a>                                 |
|                      |                   | Demand    | Water abstraction         | Drinking water requirements of households based on regional data downscaled to municipality level using touristic and demographic data [3]                                                                                                                                                                   | $\text{m}^3 \text{ ha}^{-1} \text{ y}^{-1}$ | <a href="http://www.wikialps.eu/doku.php?id=wiki:water_abstraction">http://www.wikialps.eu/doku.php?id=wiki:water_abstraction</a>                 |
|                      | Grassland biomass | Supply    | Gross fodder production   | Forage production on permanent grassland estimated based on growth functions for different grassland management types depending on the length of the growing season and with consideration of site parameters such as precipitation and sum of radiation [4]                                                 | $\text{t DM ha}^{-1} \text{ y}^{-1}$        | <a href="http://www.wikialps.eu/doku.php?id=wiki:gross_fodder_production">http://www.wikialps.eu/doku.php?id=wiki:gross_fodder_production</a>     |
|                      |                   | Flow      | Net fodder energy content | Actual used fraction of forage production based on the energy content of the raw material including losses from harvest and storage [4]                                                                                                                                                                      | $\text{MJ NEL ha}^{-1} \text{ y}^{-1}$      | <a href="http://www.wikialps.eu/doku.php?id=wiki:net_fodder_energy_content">http://www.wikialps.eu/doku.php?id=wiki:net_fodder_energy_content</a> |
|                      |                   | Demand    | Feed energy requirements  | Energy demand of forage feeding livestock species based on agricultural census data, age class, herd composition and performance demand for cows' milk production [4]                                                                                                                                        | $\text{MJ NEL ha}^{-1} \text{ y}^{-1}$      | <a href="http://www.wikialps.eu/doku.php?id=wiki:feed_energy_requirements">http://www.wikialps.eu/doku.php?id=wiki:feed_energy_requirements</a>   |
|                      | Fuel wood         | Supply    | Wood biomass increment    | Annual increment of above-ground biomass in forests based on IPCC equations [5]                                                                                                                                                                                                                              | $\text{m}^3 \text{ ha}^{-1} \text{ y}^{-1}$ | <a href="http://www.wikialps.eu/doku.php?id=wiki:wood_biomass_increment">http://www.wikialps.eu/doku.php?id=wiki:wood_biomass_increment</a>       |

| Category           | Ecosystem service                   | Component   | Indicator                                | Method                                                                                                                                                                       | Unit                                               | Full details on data sources and methods                                                                                                    |
|--------------------|-------------------------------------|-------------|------------------------------------------|------------------------------------------------------------------------------------------------------------------------------------------------------------------------------|----------------------------------------------------|---------------------------------------------------------------------------------------------------------------------------------------------|
| Regulating service |                                     | Flow        | Wood removals                            | Timber removals for fuel wood production considering forest accessibility and in-site conditions [6]                                                                         | m <sup>3</sup> ha <sup>-1</sup> y <sup>-1</sup>    | <a href="http://www.wikialps.eu/doku.php?id=wiki:wood_removals">http://www.wikialps.eu/doku.php?id=wiki:wood_removals</a>                   |
|                    |                                     | Demand      | Potential fuel wood requirements         | Fuel wood requirements based on statistics of fuelwood consumption, building areas and heating degree days                                                                   | m <sup>3</sup> y <sup>-1</sup>                     | <a href="http://www.wikialps.eu/doku.php?id=wiki:fuel_wood_requirements">http://www.wikialps.eu/doku.php?id=wiki:fuel_wood_requirements</a> |
|                    | Filtration of surface water         | Supply      | Potential nitrogen removals              | Potential nitrogen filtration capability based on the InVEST NDR model [2]                                                                                                   | %                                                  | <a href="http://www.wikialps.eu/doku.php?id=wiki:nitrogen_removals">http://www.wikialps.eu/doku.php?id=wiki:nitrogen_removals</a>           |
|                    |                                     | Flow        | Effective nitrogen removals              | Amount of nitrogen filtered by ecosystems based on InVEST NDR model [2]                                                                                                      | kg ha <sup>-1</sup> y <sup>-1</sup>                | <a href="http://www.wikialps.eu/doku.php?id=wiki:nitrogen_removal_2">http://www.wikialps.eu/doku.php?id=wiki:nitrogen_removal_2</a>         |
|                    |                                     | Demand      | Nitrogen loads                           | Amount of nitrogen introduced in ecosystems based on: nitrogen emitted in the atmosphere and then deposited in the landscape, nitrogen used for fertilisation in agriculture | kg ha <sup>-1</sup> y <sup>-1</sup>                | <a href="http://www.wikialps.eu/doku.php?id=wiki:nitrogen_loads">http://www.wikialps.eu/doku.php?id=wiki:nitrogen_loads</a>                 |
|                    | Protection against mountain hazards | Supply      | Site-protecting forest                   | Forest area with a protective effect against potential avalanches, rock falls and channel processes [7]                                                                      | %                                                  | <a href="http://www.wikialps.eu/doku.php?id=wiki:protection_forest_calc">http://www.wikialps.eu/doku.php?id=wiki:protection_forest_calc</a> |
|                    |                                     | Flow        | Object-protecting forest                 | Forest area with a protective effect for human infrastructure against potential avalanches and rock falls [7]                                                                | %                                                  |                                                                                                                                             |
|                    |                                     | Demand      | Infrastructure in hazard zones           | Area of human infrastructure located in avalanche and rock-fall hazard zones [8]                                                                                             | %                                                  |                                                                                                                                             |
|                    | Carbon sequestration                | Supply/flow | CO <sub>2</sub> sequestration by forests | Annual rate of CO <sub>2</sub> sequestration by above- and below-ground biomass in forests based on IPCC equations [5]                                                       | t CO <sub>2</sub> ha <sup>-1</sup> y <sup>-1</sup> | <a href="http://www.wikialps.eu/doku.php?id=wiki:co2_sequestration">http://www.wikialps.eu/doku.php?id=wiki:co2_sequestration</a>           |

| Category         | Ecosystem service           | Component | Indicator                       | Method                                                                                                                                                                                                                                  | Unit                                               | Full details on data sources and methods                                                                                                                |
|------------------|-----------------------------|-----------|---------------------------------|-----------------------------------------------------------------------------------------------------------------------------------------------------------------------------------------------------------------------------------------|----------------------------------------------------|---------------------------------------------------------------------------------------------------------------------------------------------------------|
|                  |                             | Demand    | CO <sub>2</sub> emissions       | Annual rate of CO <sub>2</sub> emissions based on different emission inventories [9,10]                                                                                                                                                 | t CO <sub>2</sub> ha <sup>-1</sup> y <sup>-1</sup> | <a href="http://www.wikialps.eu/doku.php?id=wiki:co2_emissions">http://www.wikialps.eu/doku.php?id=wiki:co2_emissions</a>                               |
| Cultural service | Outdoor recreation          | Supply    | Outdoor recreation availability | Recreation opportunities provided by ecosystems based on six landscape indicators (naturalness, protected areas, presence of water, landscape diversity, terrain ruggedness, density of mountain peaks), weighted by accessibility [11] | Index                                              | <a href="http://www.wikialps.eu/doku.php?id=wiki:recreational_offer">http://www.wikialps.eu/doku.php?id=wiki:recreational_offer</a>                     |
|                  |                             | Flow      | Visitation rates                | Annual visitation rates estimated from the density of georeferenced photographs referred to user-days [11]                                                                                                                              | Index                                              | <a href="http://www.wikialps.eu/doku.php?id=wiki:visitation_rate">http://www.wikialps.eu/doku.php?id=wiki:visitation_rate</a>                           |
|                  |                             | Demand    | Potential beneficiaries         | Density of potential beneficiaries derived from the number of residents and overnight stays of tourists [11]                                                                                                                            | Resident equivalent (index)                        | <a href="http://www.wikialps.eu/doku.php?id=wiki:beneficiaries">http://www.wikialps.eu/doku.php?id=wiki:beneficiaries</a>                               |
|                  | Symbolic plants and animals | Supply    | Habitats of symbolic species    | Spatial distribution of habitats of selected symbolic plants and animals using habitat models or distribution maps [12]                                                                                                                 | Area-weighted index                                | <a href="http://www.wikialps.eu/doku.php?id=wiki:habitats_of_symbolic_species">http://www.wikialps.eu/doku.php?id=wiki:habitats_of_symbolic_species</a> |
|                  |                             | Flow      | Occurrence in hotel names       | Mapping of the occurrence of selected symbolic plants and animals in hotel names [13]                                                                                                                                                   | Number of hotels (n)                               | <a href="http://www.wikialps.eu/doku.php?id=wiki:occurrence_in_hotel_names">http://www.wikialps.eu/doku.php?id=wiki:occurrence_in_hotel_names</a>       |

Table S2. Sustainability indicators related to economic, environmental and social dimensions (adapted from [14]).

| Category    | Indicator name                                         | Unit               | Description                                                                                                                                                                                                                                                                                                                                                                                                                             | Data source                                                                                        |
|-------------|--------------------------------------------------------|--------------------|-----------------------------------------------------------------------------------------------------------------------------------------------------------------------------------------------------------------------------------------------------------------------------------------------------------------------------------------------------------------------------------------------------------------------------------------|----------------------------------------------------------------------------------------------------|
| Environment | Artificial areas                                       | %                  | The indicator represents the percentage of artificial areas per total municipal area based on Corine Land Cover 2012. The following land cover classes were used: 1.1 – Urban fabrics, 1.2 – Industrial, commercial and transport units, 1.3 – Mine, dump and construction sites, and 1.4 – Artificial, non-agricultural vegetated areas.                                                                                               | Corine land cover 2012 [15], resolution: 100x100 m                                                 |
|             | Forest areas                                           | %                  | The indicator represents the percentage of area covered by forests per total municipality area. All land cover types falling in the classes 1 – broadleaved forests, and 2 – coniferous forests, were used.                                                                                                                                                                                                                             | Copernicus Land Monitoring Services: High Resolution Layer, Forests 2015 [16], resolution: 20x20 m |
|             | Near-natural and natural open areas                    | %                  | The indicator represents the percentage of area covered by near-natural and natural open areas in each municipality based on Corine Land Cover 2012. The following land cover classes were used: 3.2 – Shrub and/or herbaceous vegetation associations, 3.3 – Open space with little or no vegetation, 4.1 – Inland wetlands, 4.2 – Coastal wetlands and 5.1 – Inland waters were used to identify near-natural and natural open areas. | Corine land cover 2012 [15], resolution: 100x100 m                                                 |
|             | Land-cover diversity of agricultural areas             | n km <sup>-2</sup> | The indicator represents the number of different land-cover types found in agricultural areas per km <sup>2</sup> . The following land cover classes were used: 2.1 – Arable land, 2.2 – Permanent crops, 2.3 – Pastures, 2.4 – heterogeneous agricultural areas.                                                                                                                                                                       | Corine land cover 2012 [15], resolution: 100x100 m                                                 |
|             | Land-cover diversity of near-natural and natural areas | n km <sup>-2</sup> | The indicator represents the number of land-cover types found in near-natural and natural areas per km <sup>2</sup> .                                                                                                                                                                                                                                                                                                                   | Corine land cover 2012 [15], resolution: 100x100 m                                                 |
|             | Road density                                           | m km <sup>-2</sup> | The indicator represents the road density of all paved roads. It was calculated dividing the road length by the total municipal area (m/km <sup>2</sup> ).                                                                                                                                                                                                                                                                              | OpenStreetMap (road network) [17]                                                                  |
|             | Special protected areas                                | %                  | The indicator represents the percentage of municipal area that is covered by special protection of SPA sites. For Switzerland and Liechtenstein, IBA (Important Bird Areas) were selected as comparable protected areas to the European SPAs.                                                                                                                                                                                           | EU: Natura2000 database (SPA sites only) [18]; CH&LI: BirdLife Switzerland (IBA sites) [19]        |
|             | Natura 2000 areas                                      | %                  | The indicator represents the percentage of area covered by a Natura 2000 site, to the total municipal area. For Switzerland and Liechtenstein comparable protected sites were chosen: namely, “Smaragd Gebiete” and the Swiss Important Bird Areas (IBA), and Liechtenstein’s nationally designated areas (CDDA).                                                                                                                       | EU: Natura2000 database [18]; CH: Smaragd Gebiete (Bundesamt für Umwelt [20], IBA sites            |

| Category | Indicator name                       | Unit | Description                                                                                                                                                                                            | Data source                                                        |
|----------|--------------------------------------|------|--------------------------------------------------------------------------------------------------------------------------------------------------------------------------------------------------------|--------------------------------------------------------------------|
|          |                                      |      |                                                                                                                                                                                                        | (BirdLife CH) [19]; LI: CDDA boundaries (EEA Europe) [21]          |
| Society  | Population                           | n    | The indicator represents the number of residents for each municipality within the Alpine Space for the reference year 2011.                                                                            | National statistical offices 2011 [22]                             |
|          | Natural population growth            | %    | The indicator represents the natural population, calculated by taking the difference between births and deaths registered in the year 2011, in relation to the total population of each municipality.  | National statistical offices 2011 [22]                             |
|          | Youth rate                           | %    | The indicator is calculated as the ratio between the number of young persons (under 15), and the number of persons in working age (between 15 and 64 years old), expressed as a percentage.            | National statistical offices 2011 [22]                             |
|          | Old age rate                         | %    | The indicator is calculated as the ratio between the number of persons in retirement age (over 64), and the number of persons in working age (between 15 and 64 years old), expressed as a percentage. | National statistical offices 2011 [22]                             |
|          | Old to young age ratio               | %    | The indicator is calculated as the ratio of the number old persons (over 64) to the number of young persons (under 15).                                                                                | National statistical offices 2011 [22]                             |
|          | Single-person households             | %    | The indicator is calculated as the ratio of single-person households to the total number of private households, expressed as a percentage.                                                             | National statistical offices 2011 [22]                             |
|          | Average household size               | n    | The indicator is calculated as the ratio of residents to the total of private households of a municipality. It gives a measure of how many people on average share a household.                        | National statistical offices 2011 [22]                             |
|          | Divorced residents                   | %    | The indicator is calculated as the percentage of divorced to the total number of residents of the municipality.                                                                                        | National statistical offices 2011 [22]                             |
| Economy  | Total employment rate                | %    | The indicator is calculated as the ratio of the number persons of unemployable age to the number of persons aged 15-64, expressed as a percentage.                                                     | National statistical offices 2011 [22]                             |
|          | Cultural and recreational facilities | n    | The indicator represents the number of cultural and recreational facilities per 1000 residents for each municipality.                                                                                  | National statistical offices 2011 [22]<br>OpenStreet Map data [16] |

| Category | Indicator name                      | Unit                            | Description                                                                                                                                                                                              | Data source                               |
|----------|-------------------------------------|---------------------------------|----------------------------------------------------------------------------------------------------------------------------------------------------------------------------------------------------------|-------------------------------------------|
|          | Farm density                        | n. of farms<br>km <sup>-1</sup> | The indicator represents the number of farms per square kilometer of municipal area.                                                                                                                     | National statistical offices 2011<br>[22] |
|          | Enterprise density                  | n                               | The indicator is calculated as the ratio of enterprises in the secondary and tertiary sector to the total number of residents of a municipality.                                                         | National statistical offices 2011<br>[22] |
|          | Out-commuters ratio                 | %                               | The indicator represents the percentage of out-commuters in relation to the total number of employed persons of each municipality.                                                                       | National statistical offices 2011<br>[22] |
|          | In-commuters ratio                  | %                               | The indicator represents the percentage of in-commuters in relation to the total number of employed persons in each municipality.                                                                        | National statistical offices 2011<br>[22] |
|          | Commuter balance                    | %                               | The indicator is calculated as the difference between in-commuters and out-commuters in a municipality, divided by the total number of employed persons in that municipality, expressed as a percentage. | National statistical offices 2011<br>[22] |
|          | Livestock size units (LSU) per farm | n                               | The indicator represents the average number of LSU per farm for each municipality.                                                                                                                       | National statistical offices 2011<br>[22] |

Table S3: Mean sustainability values ( $\pm$ s.e.) for municipalities within or outside hot spots of ecosystem services related to environment, society and economy; bold =  $p < 0.05$  (t-test with bootstrapping, equal variances not assumed; significance level = 99%).

|            | Ecosystem service                   | N        |       | Environment                         |                                     | Society                             |                                     | Economy                             |                                     |
|------------|-------------------------------------|----------|-------|-------------------------------------|-------------------------------------|-------------------------------------|-------------------------------------|-------------------------------------|-------------------------------------|
|            |                                     | Hot spot | Other | Hot spot                            | Other                               | Hot spot                            | Other                               | Hot spot                            | Other                               |
| Supply     | Fresh water                         | 6068     | 10717 | <b>0.440 (<math>\pm</math>.097)</b> | <b>0.397 (<math>\pm</math>.078)</b> | <b>0.810 (<math>\pm</math>.028)</b> | <b>0.818 (<math>\pm</math>.033)</b> | <b>0.333 (<math>\pm</math>.052)</b> | <b>0.321 (<math>\pm</math>.050)</b> |
|            | Grassland biomass                   | 4168     | 12617 | 0.423 ( $\pm$ .074)                 | 0.410 ( $\pm$ .092)                 | 0.815 ( $\pm$ .021)                 | 0.815 ( $\pm$ .034)                 | 0.319 ( $\pm$ .047)                 | 0.328 ( $\pm$ .052)                 |
|            | Fuel wood                           | 6025     | 10760 | <b>0.443 (<math>\pm</math>.080)</b> | <b>0.397 (<math>\pm</math>.088)</b> | <b>0.810 (<math>\pm</math>.026)</b> | <b>0.818 (<math>\pm</math>.034)</b> | 0.323 ( $\pm$ .050)                 | 0.327 ( $\pm$ .051)                 |
|            | Filtration of surface water         | 6339     | 10446 | <b>0.455 (<math>\pm</math>.091)</b> | <b>0.388 (<math>\pm</math>.075)</b> | <b>0.808 (<math>\pm</math>.035)</b> | <b>0.819 (<math>\pm</math>.029)</b> | 0.329 ( $\pm$ .056)                 | 0.324 ( $\pm$ .047)                 |
|            | Protection against mountain hazards | 4072     | 12713 | <b>0.471 (<math>\pm</math>.084)</b> | <b>0.395 (<math>\pm</math>.081)</b> | <b>0.807 (<math>\pm</math>.028)</b> | <b>0.817 (<math>\pm</math>.032)</b> | <b>0.333 (<math>\pm</math>.055)</b> | <b>0.323 (<math>\pm</math>.049)</b> |
|            | Carbon sequestration                | 6053     | 10732 | <b>0.445 (<math>\pm</math>.080)</b> | <b>0.395 (<math>\pm</math>.087)</b> | <b>0.809 (<math>\pm</math>.029)</b> | <b>0.818 (<math>\pm</math>.033)</b> | 0.324 ( $\pm$ .050)                 | 0.327 ( $\pm$ .051)                 |
|            | Outdoor recreation                  | 6019     | 10766 | <b>0.469 (<math>\pm</math>.086)</b> | <b>0.382 (<math>\pm</math>.072)</b> | <b>0.807 (<math>\pm</math>.031)</b> | <b>0.819 (<math>\pm</math>.031)</b> | 0.331 ( $\pm$ .055)                 | 0.323 ( $\pm$ .048)                 |
|            | Symbolic plants and animals         | 4015     | 12770 | <b>0.469 (<math>\pm</math>.089)</b> | <b>0.396 (<math>\pm</math>.080)</b> | <b>0.808 (<math>\pm</math>.027)</b> | <b>0.817 (<math>\pm</math>.033)</b> | <b>0.336 (<math>\pm</math>.055)</b> | <b>0.323 (<math>\pm</math>.049)</b> |
| Demand     | Fresh water                         | 3337     | 13448 | <b>0.357 (<math>\pm</math>.088)</b> | <b>0.427 (<math>\pm</math>.082)</b> | 0.820 ( $\pm$ .025)                 | 0.814 ( $\pm$ .033)                 | <b>0.338 (<math>\pm</math>.047)</b> | <b>0.323 (<math>\pm</math>.051)</b> |
|            | Grassland biomass                   | 4577     | 12208 | <b>0.366 (<math>\pm</math>.069)</b> | <b>0.431 (<math>\pm</math>.088)</b> | <b>0.823 (<math>\pm</math>.020)</b> | <b>0.812 (<math>\pm</math>.034)</b> | <b>0.334 (<math>\pm</math>.044)</b> | <b>0.323 (<math>\pm</math>.053)</b> |
|            | Fuel wood                           | 2118     | 14667 | <b>0.387 (<math>\pm</math>.080)</b> | <b>0.417 (<math>\pm</math>.088)</b> | 0.818 ( $\pm$ .054)                 | 0.814 ( $\pm$ .027)                 | 0.322 ( $\pm$ .055)                 | 0.326 ( $\pm$ .050)                 |
|            | Filtration of surface water         | 5276     | 11509 | <b>0.378 (<math>\pm</math>.079)</b> | <b>0.429 (<math>\pm</math>.087)</b> | <b>0.819 (<math>\pm</math>.020)</b> | <b>0.813 (<math>\pm</math>.035)</b> | 0.326 ( $\pm$ .044)                 | 0.326 ( $\pm$ .054)                 |
|            | Protection against mountain hazards | 2686     | 14099 | <b>0.455 (<math>\pm</math>.091)</b> | <b>0.405 (<math>\pm</math>.085)</b> | 0.813 ( $\pm$ .022)                 | 0.815 ( $\pm$ .033)                 | <b>0.335 (<math>\pm</math>.053)</b> | <b>0.324 (<math>\pm</math>.050)</b> |
|            | Carbon sequestration                | 2737     | 14048 | <b>0.364 (<math>\pm</math>.093)</b> | <b>0.423 (<math>\pm</math>.084)</b> | <b>0.820 (<math>\pm</math>.038)</b> | <b>0.814 (<math>\pm</math>.030)</b> | <b>0.332 (<math>\pm</math>.053)</b> | <b>0.325 (<math>\pm</math>.050)</b> |
|            | Outdoor recreation                  | 3368     | 13417 | <b>0.354 (<math>\pm</math>.085)</b> | <b>0.428 (<math>\pm</math>.082)</b> | 0.820 ( $\pm$ .025)                 | 0.814 ( $\pm$ .033)                 | <b>0.336 (<math>\pm</math>.046)</b> | <b>0.323 (<math>\pm</math>.052)</b> |
| Actual use | Fresh water                         | 3391     | 13394 | <b>0.358 (<math>\pm</math>.087)</b> | <b>0.427 (<math>\pm</math>.082)</b> | 0.818 ( $\pm$ .020)                 | 0.814 ( $\pm$ .034)                 | <b>0.339 (<math>\pm</math>.043)</b> | <b>0.323 (<math>\pm</math>.052)</b> |
|            | Grassland biomass                   | 4177     | 12608 | 0.420 ( $\pm$ .073)                 | 0.411 ( $\pm$ .092)                 | 0.815 ( $\pm$ .021)                 | 0.815 ( $\pm$ .034)                 | <b>0.319 (<math>\pm</math>.047)</b> | <b>0.328 (<math>\pm</math>.052)</b> |
|            | Fuel wood                           | 5072     | 11713 | 0.417 ( $\pm$ .082)                 | 0.412 ( $\pm$ .090)                 | 0.816 ( $\pm$ .037)                 | 0.815 ( $\pm$ .029)                 | 0.325 ( $\pm$ .046)                 | 0.326 ( $\pm$ .053)                 |
|            | Filtration of surface water         | 5008     | 11777 | <b>0.370 (<math>\pm</math>.066)</b> | <b>0.432 (<math>\pm</math>.090)</b> | <b>0.827 (<math>\pm</math>.018)</b> | <b>0.810 (<math>\pm</math>.035)</b> | <b>0.319 (<math>\pm</math>.050)</b> | <b>0.329 (<math>\pm</math>.051)</b> |
|            | Protection against mountain hazards | 3314     | 13471 | <b>0.465 (<math>\pm</math>.088)</b> | <b>0.400 (<math>\pm</math>.083)</b> | 0.812 ( $\pm$ .024)                 | 0.816 ( $\pm$ .033)                 | <b>0.336 (<math>\pm</math>.054)</b> | <b>0.323 (<math>\pm</math>.050)</b> |
|            | Carbon sequestration                | 6053     | 10732 | <b>0.445 (<math>\pm</math>.080)</b> | <b>0.395 (<math>\pm</math>.087)</b> | <b>0.809 (<math>\pm</math>.029)</b> | <b>0.818 (<math>\pm</math>.033)</b> | 0.324 ( $\pm$ .050)                 | 0.327 ( $\pm$ .051)                 |
|            | Outdoor recreation                  | 5564     | 11221 | <b>0.401 (<math>\pm</math>.098)</b> | <b>0.419 (<math>\pm</math>.082)</b> | 0.814 ( $\pm$ .026)                 | 0.816 ( $\pm$ .034)                 | <b>0.339 (<math>\pm</math>.048)</b> | <b>0.319 (<math>\pm</math>.051)</b> |
|            | Symbolic plants and animals         | 1162     | 15623 | <b>0.479 (<math>\pm</math>.082)</b> | <b>0.408 (<math>\pm</math>.086)</b> | 0.815 ( $\pm$ .041)                 | 0.815 ( $\pm$ .031)                 | 0.344 ( $\pm$ .064)                 | 0.325 ( $\pm$ .049)                 |



## References

1. Schirpke, U.; Candiago, S.; Egarter Vigl, L.; Jäger, H.; Labadini, A.; Marsoner, T.; Meisch, C.; Tasser, E.; Tappeiner, U. Integrating supply, flow and demand to enhance the understanding of interactions among multiple ecosystem services. *Sci Total Environ* **2019**, *651*, 928-941, DOI <https://doi.org/10.1016/j.scitotenv.2018.09.235>.
2. Sharp, R.; Tallis, H.T.; Ricketts, T.; Guerry, A.D.; Wood, S.A.; Chaplin-Kramer, R.; Nelson, E.; Ennaanay, D.; Wolny, S.; Olwero, N.; Vigerstol, K.; Pennington, D.; Mendoza, G.; Aukema, J.; Foster, J.; Forrest, J.; Cameron, D.; Arkema, K.; Lonsdorf, E.; Kennedy, C.; Verutes, G.; Kim, C.K.; Guannel, G.; Papenfus, M.; Toft, J.; Marsik, M.; Bernhardt, J.; Griffin, R.; Glowinski, K.; Chaumont, N.; Perelman, A.; Lacayo, M.; Mandle, L.; Hamel, P.; Vogl, A.L.; Rogers, L.; Bierbower, W.; Denu, D.; Douglass, J. *InVEST 3.5.0.post356+n4e98368ac2f6 User's Guide*, The Natural Capital Project, Stanford University, University of Minnesota, The Nature Conservancy, and World Wildlife Fund: **2018**;
3. Meisch, C.; Schirpke, U.; Huber, L.; Rüdissler, J.; Tappeiner, U. Assessing freshwater provision and consumption in the Alpine Space applying the ecosystem service concept. *Sustainability* **2019**, *11*(4), 1131.
4. Jäger, H.; Peratoner, G.; Tappeiner, U.; Tasser, E. Forage Yield from Grassland - Ecosystem Service Status and Perspective under Climate Change in the European Alpine Space. *Sci Total Environ* **2019**.
5. Eggleston, H.; Buendia, L.; Miwa, K.; Ngara, T.; Tanabe, K. 2006 IPCC guidelines for national greenhouse gas inventories. *A report prepared by the Task Force on National Greenhouse Gas Inventories of the Intergovernmental Panel on Climate Change*. (Institute for Global Environmental Strategies: Hayama, Japan) Available at: (accessed 2 April 2008) **2006**.
6. Clouet, N.; Berger, F. Modélisation des surfaces débardables au tracteur forestier en zone de montagne. *Géomatique expert* **2009**, *970*, 77-81.
7. Voigt, S., Der Schutzwald im Alpenraum. Länderübergreifende Harmonisierung der Abgrenzungskriterien für die Schutzwaldausweisung und deren GIS-gestützte Modellierung und Verortung. Master Thesis, Zentrum für GeoInformatik (Z\_GIS), Paris Lodron-Universität Salzburg, Salzburg, **2013**.
8. Bauerhansl, C.; Berger, F.; Dorren, L.; Duc, P.; Ginzler, C.; Kleemayr, K.; Koch, V.; Koukal, T.; Mattiuzzi, M.; Perzl, F. Development of harmonized indicators and estimation procedures for forests with protective functions against natural hazards in the alpine space (PROALP). *Luxembourg: Office for Official Publications of the European Communities, JRC Scientific and Technical Report* **2010**, *56151*, 181.
9. Trombetti, M.; Pisoni, E.; Lavallo, C. Downscaling methodology to produce a high resolution gridded emission inventory to support local/city level air quality policies. *Office for Official Publications of the European Communities, Luxembourg EUR* **2017**, *28428*.
10. European Commission Emission Database for Global Atmospheric Research (EDGAR), release EDGARv4.2 FT2012. **2014**.
11. Schirpke, U.; Meisch, C.; Marsoner, T.; Tappeiner, U. Revealing spatial and temporal patterns of outdoor recreation in the European Alps and their surroundings. *Ecosystem Services* **2018**, *31*, 336-350.
12. Schirpke, U.; Meisch, C.; Tappeiner, U. Symbolic species as a cultural ecosystem service in the European Alps: insights and open issues. *Landscape Ecol* **2018**, *33*, 711-730.
13. Rüdissler, J.; Schirpke, U.; Tappeiner, U. Symbolic entities in the European Alps: perception and use of a cultural ecosystem service. *Ecosystem Services* **2019**,

14. Tappeiner, U.; Borsdorf, A.; Tasser, E. *Alpenatlas: Society, economy, environment= Atlas des Alpes= Atlante delle Alpi= Atlas Alp= Mapping the Alps*, Spektrum, Akad. Verl.: **2008**.
15. European Environment Agency (EEA). Corine Land Cover (CLC) **2012**. Version 18.5.1. Available from: <https://land.copernicus.eu/pan-european/corine-land-cover/clc-2012>
16. European Environment Agency (EEA). Pan-European High Resolution Layers (HRL) **2015** - Forests. Available from: <https://land.copernicus.eu/pan-european/high-resolution-layers/forests>
17. OpenStreetMap (OSM). User-Generated Street Maps **2015**. Available from: <http://www.openstreetmap.org>
18. European Environment Agency (EEA). Natura 2000 data - the European network of protected sites **2015**. Available from: <https://www.eea.europa.eu/data-and-maps/data/natura-9>.
19. BirdLife. Important Bird and Biodiversity Areas (IBA) **2015**. Available from: <https://www.birdlife.ch/de/iba>
20. Bundesamt für Umwelt (BAFU). Biodiversität: Smaragd-Gebiete **2015**. Available from: <https://www.bafu.admin.ch/bafu/de/home/themen/biodiversitaet/fachinformationen/massnahmen-zur-erhaltung-und-foerderung-der-biodiversitaet/oekologische-infrastruktur/smaragd-gebiete.html>
21. European Environment Agency (EEA). Nationally designated areas (CDDA) **2015**. Available from: <https://www.eea.europa.eu/data-and-maps/data/nationally-designated-areas-national-cdda-10>
22. National statistical offices of France, Italy, Germany, Austria, Slovenia, Switzerland and Lichtenstein **2011**. Available from: <https://ec.europa.eu/eurostat/web/links>
